# Supplementary material for: A genome-wide screen identifies SCAI as a modulator of the UV-induced replicative stress response
Source: PubMed Central journal article supplement (PMC9584372; doi:10.1371/journal.pbio.3001543), 2022-10-10
Supplement: pbio.3001543.s009.pdf [file pbio.3001543.s009.pdf]

# Raw images for Fig 2B

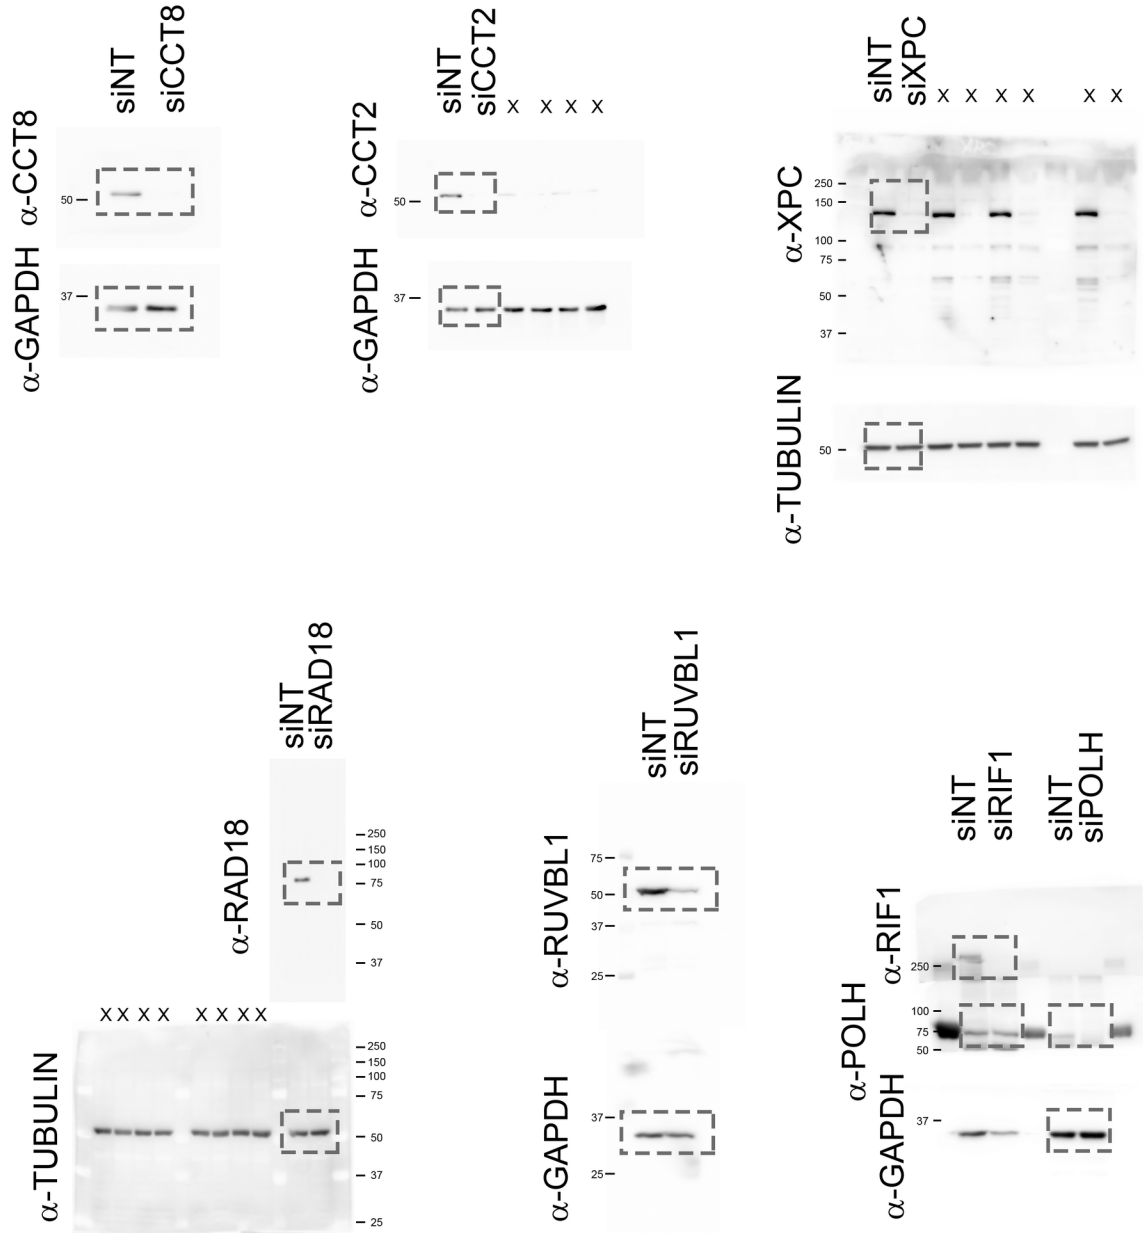

### Raw images for Fig 7

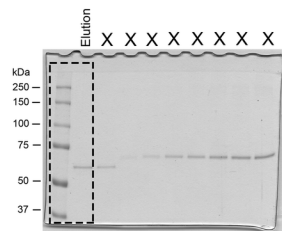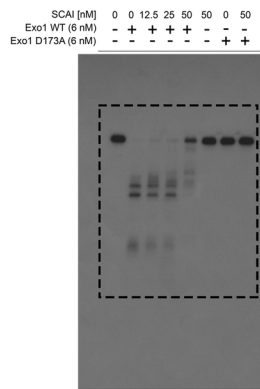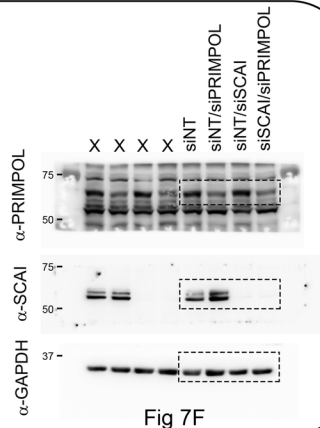

### Raw images for Fig 5

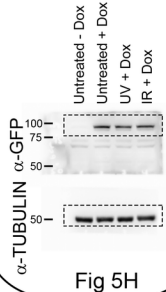

### Raw images for Fig 6

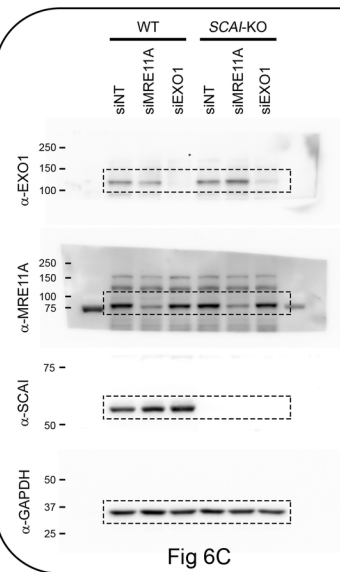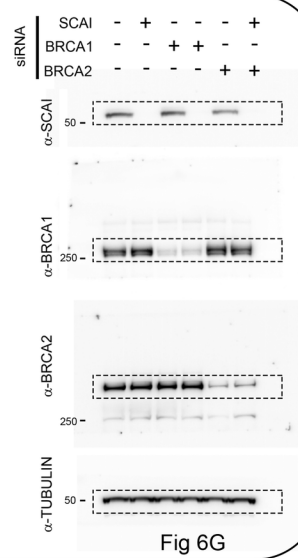

### Raw images for Fig 3

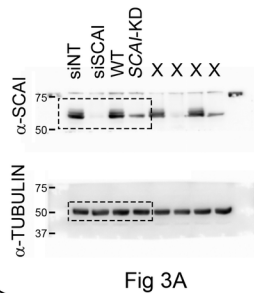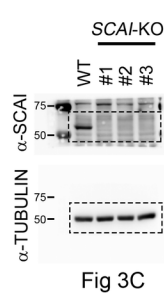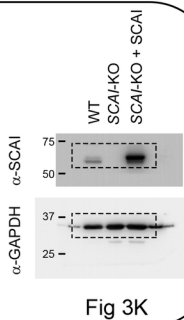

### Raw images for Fig 4

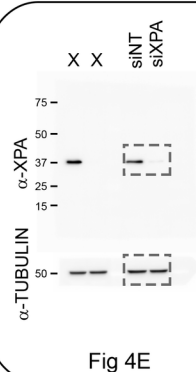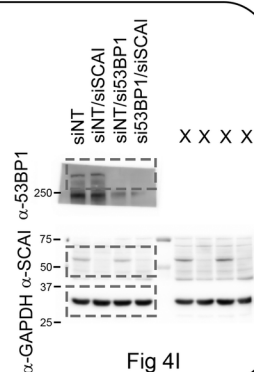

# Raw images for Fig S1

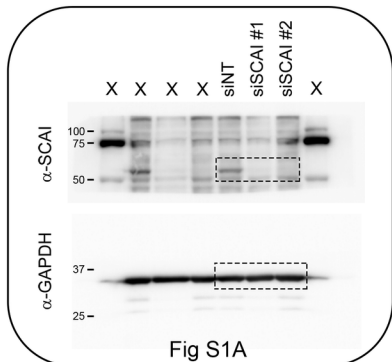

Fig S1A

# Raw images for Fig S2

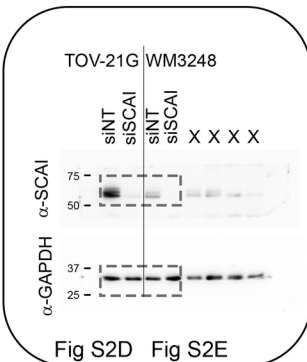

Fig S2D Fig S2E

# Raw images for Fig S6

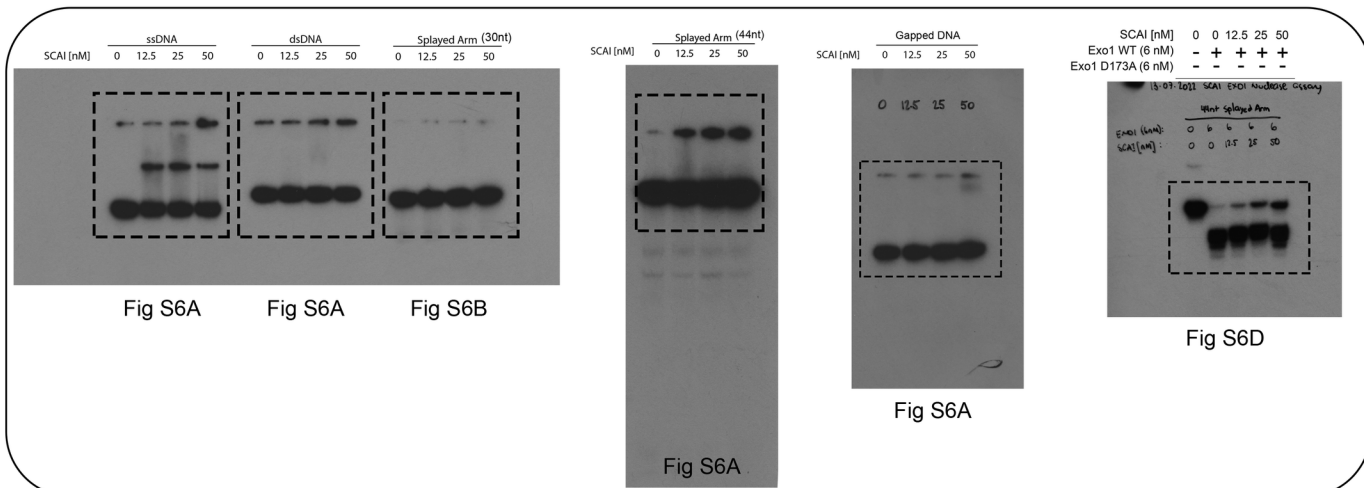

Fig S6A

Fig S6A

Fig S6B

Fig S6A

Fig S6A

Fig S6D

# Raw images for Fig S7

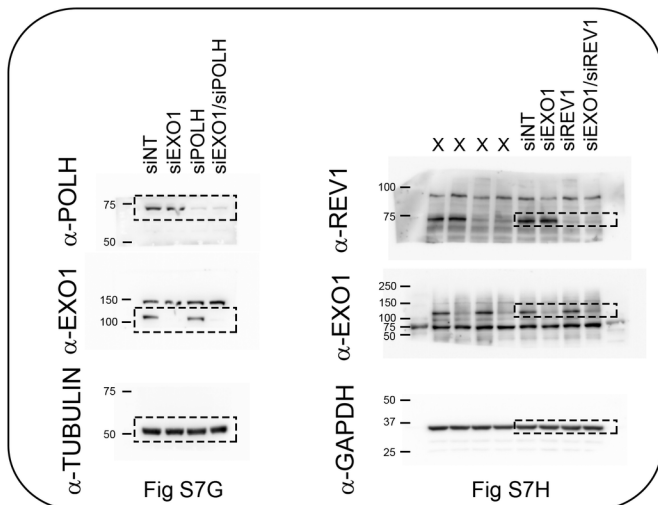

Fig S7G

Fig S7H
